# Supplementary material for: Self-supporting CoP-C nanosheet arrays derived from a metal–organic framework as synergistic catalysts for efficient water splitting
Source: Royal Society of Chemistry journal article supplement (doi:10.1039/d1dt03638f), 2021-01-01
Supplement: d1dt03638f1.pdf [file d1dt03638f1.pdf]

## Supporting Information for

### Self-supporting CoP-C nanosheet arrays derived from Metal-Organic Framework as synergistic catalysts for efficient water splitting

Min Wang<sup>a,b</sup>, Yuanzhuo Li<sup>a</sup>, Lingling Zhai<sup>b</sup>, Xiang Zhang<sup>a,\*</sup>, Shuping Lau<sup>b,\*</sup>

#### 1. Experimental Procedures

**1.1 Chemicals:** Co(NO<sub>3</sub>)<sub>2</sub>·6H<sub>2</sub>O, 1,4-benzene dicarboxylic acid, polyvinyl pyrrolidone (Mw = 58000), DMF, EtOH, KOH, KSCN, 20% Pt/C and RuO<sub>2</sub> were purchased from Sigma Aldrich. NaH<sub>2</sub>PO<sub>2</sub> was used as the phosphorus source for phosphatization. Nickel foam (NF) with a thickness of 1.7 cm was purchased from Sigma Aldrich. 1 M KOH was purchased from Aladdin Ltd. (Shanghai, China). All chemicals were used as received without further purification. The ultra-pure water was purified through a Millipore system.

#### 1.2 Synthesis Procedures

##### Synthesis of Ni<sub>2</sub>P/NF

Commercial NF was washed with 3 M HCl and EtOH three times. The fresh NF in porcelain was placed at the middle of the furnace, and NaH<sub>2</sub>PO<sub>2</sub> (0.5 g) in another porcelain boat was placed upstream of the furnace. The samples were heated at 300 °C for 1.5 h in the Ar atmosphere, with a ramping rate of 6 °C min<sup>-1</sup>. After cooling down, a Ni<sub>2</sub>P coating on the surface of NF (Ni<sub>2</sub>P/NF) was obtained.

##### Synthesis of CoP-C/NF

The synthesized CoP-C/NiO/NF was further annealed for 1.5 h at 400 °C with a heat rate of 7 °C min<sup>-1</sup> under 5 % H<sub>2</sub> and 95 % Ar mixed atmosphere, and the total flow was about 70 mL min<sup>-1</sup>. After annealing, the NiO coating on the NF was converted into Ni (0), so a CoP-C nanosheet array supported by NF (CoP-C/NF) was obtained.

##### Synthesis of CoP-C/Ni-P/NF

The synthesized Co<sub>2</sub>(OH)<sub>2</sub>(BDC) /NiO/NF was annealed for 1.5 h at 365 °C with a heat rate of 7 °C min<sup>-1</sup> under 5 % H<sub>2</sub> and 95 % Ar mixed atmosphere total flow was about 70 mL min<sup>-1</sup>. After annealing, the self-supporting complex was placed directly at the middle of a furnace, and NaH<sub>2</sub>PO<sub>2</sub> (0.6 g) in another porcelain boat was placed upstream of the furnace. Subsequently, the samples were heated at 350 °C for 1.5 h in the Ar atmosphere, with a ramping rate of 6 °C min<sup>-1</sup>. After phosphorization, the CoP-C nanosheet array supported by the Ni<sub>2</sub>P-Ni<sub>5</sub>P<sub>4</sub> coated NF (CoP-C/Ni-P/NF) was

obtained.

## 2. Figures and tables

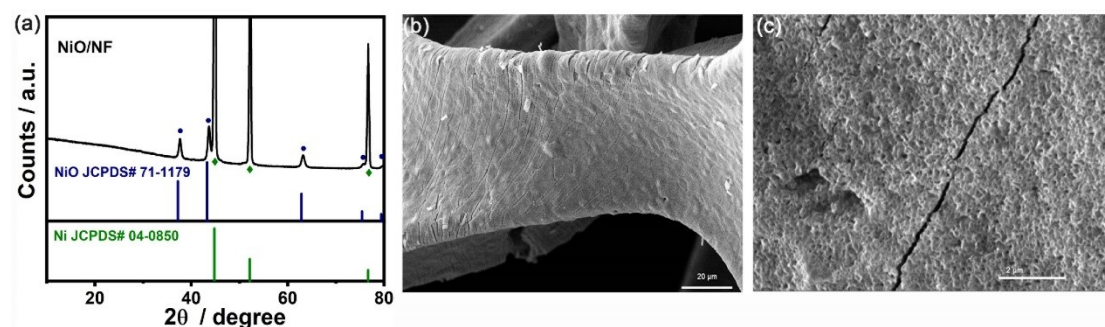

**Fig. S1** XRD (a) SEM images under low magnification (b) and high magnification (c) of the pre-oxidized NF.

After oxidation, the surface of the NF becomes rough, although it seems smooth in a low magnification scanning electron microscopy (SEM) image. The X-ray diffraction (XRD) peaks at  $37.4^\circ$ ,  $43.3^\circ$ ,  $61.8^\circ$ ,  $75.4^\circ$ ,  $79.3^\circ$  correspond to NiO (JCPDS# 71-1179). Strong diffraction peaks at  $44.5^\circ$ ,  $51.8^\circ$ ,  $76.3^\circ$  index to the metallic nickel of NF (JCPDS# 04-0850). These results above hint towards the formation of NiO coating on the surface of NF (NiO/NF).

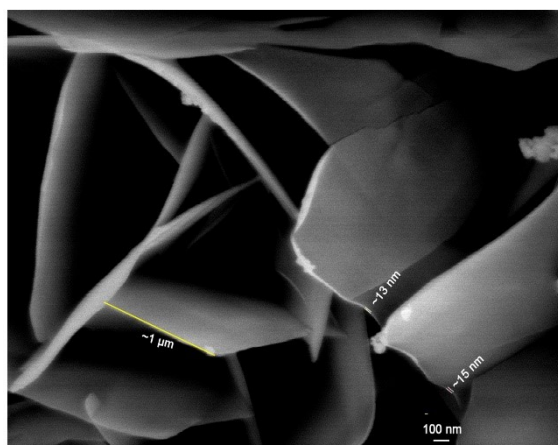

**Fig. S2** The enlarged SEM image of Co<sub>2</sub>(OH)<sub>2</sub>(BDC) nanosheet on the NiO/NF

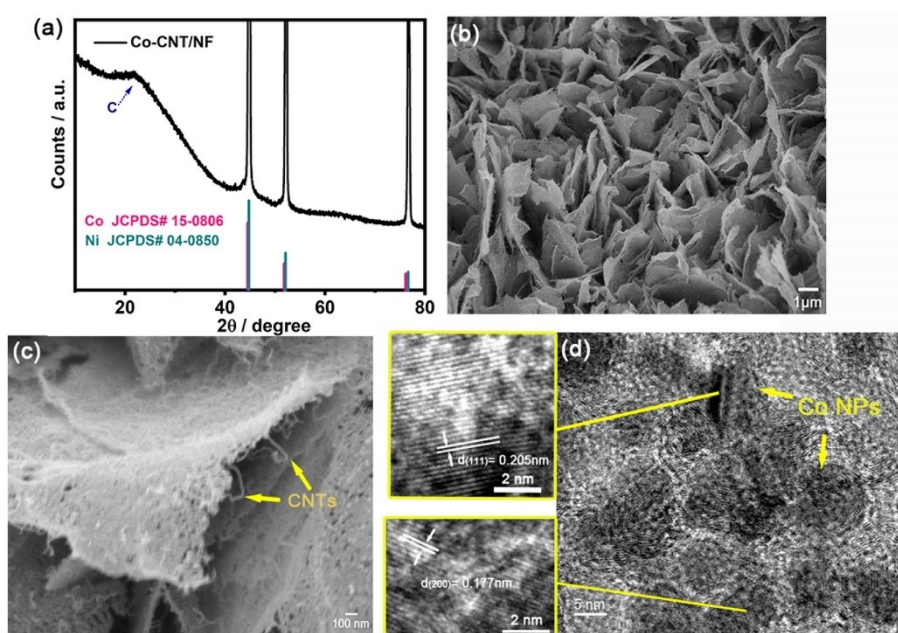

**Fig. S3** Characterization of the Co-CNT/NF: (a) XRD spectrum, (b) and (c) SEM images in different magnifications, (d) TEM image of Co-CNT nanosheet. Inset: lattice fringes of Co nanoparticles.

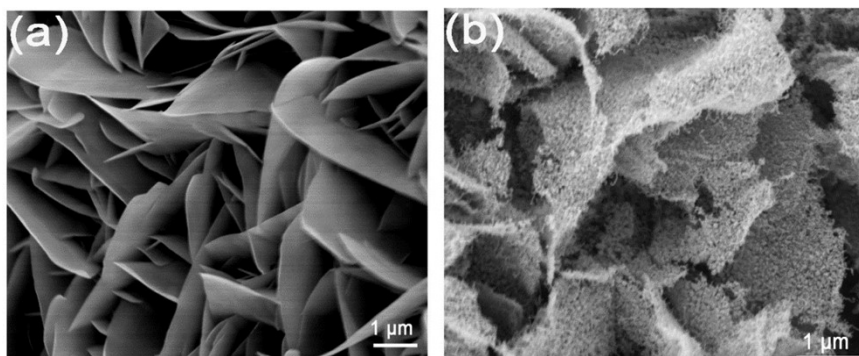

**Fig. S4** SEM images of the  $\text{Co}_2(\text{OH})_2(\text{BDC})/\text{NiO}/\text{NF}$  after calcination at 350 °C (a) and 450 °C (b) under 5%  $\text{H}_2$ -95% Ar mixed atmosphere for 1.5 h.

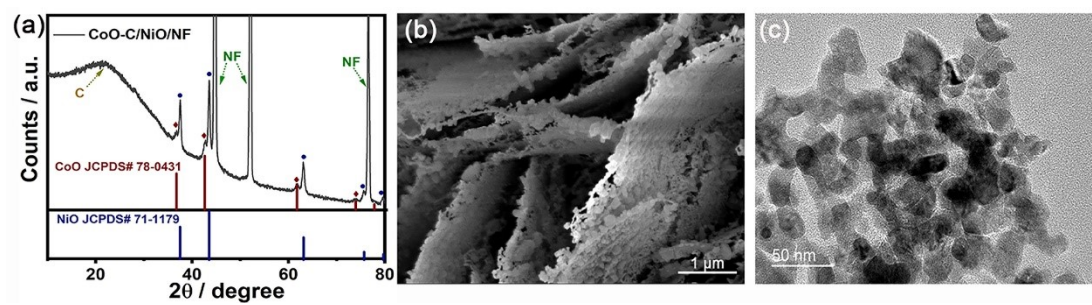

**Fig. S5** XRD pattern (a), SEM image (b) and TEM image (b) of the Co<sub>2</sub>(OH)<sub>2</sub>(BDC) nanosheet after calcination at 400 °C in pure Ar atmosphere.

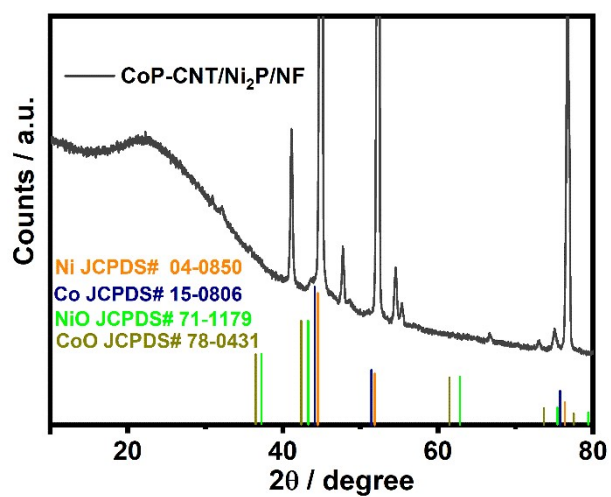

**Fig. S6** The spectrum to contrast the XRD pattern of CoP-CNT/Ni<sub>2</sub>P/NF and the standard card of metallic Co/Ni and CoO/NiO.

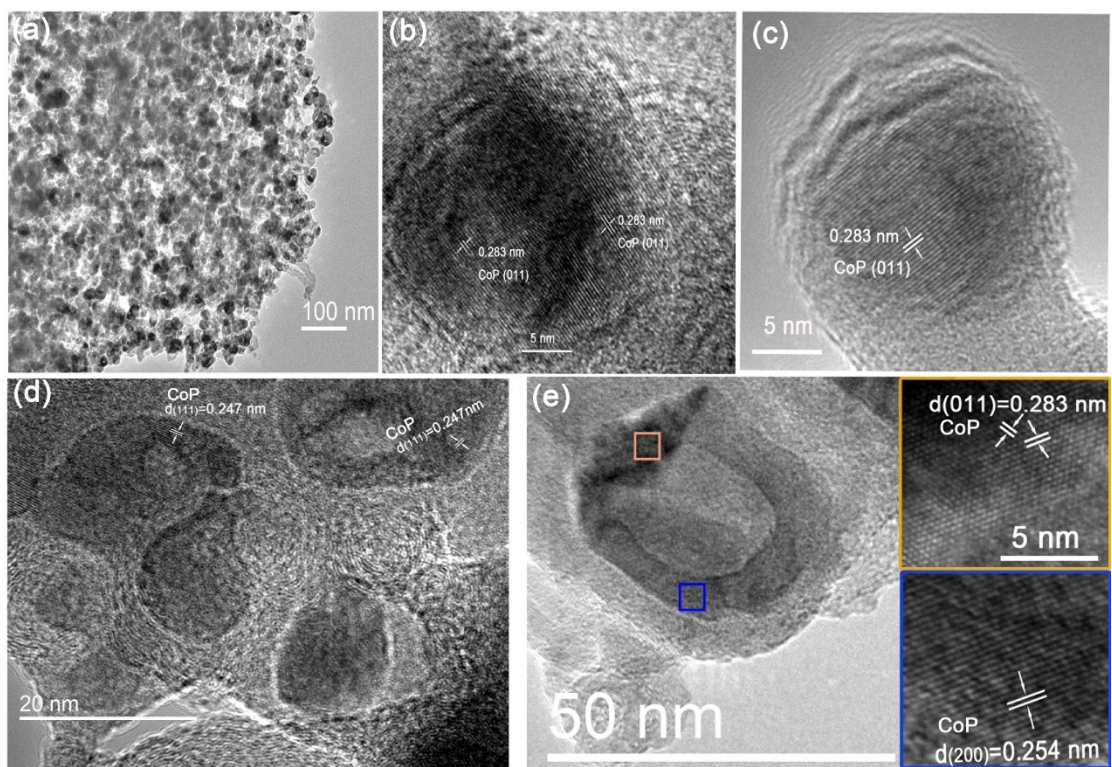

**Fig. S7** TEM images of the CoP-CNT/Ni<sub>2</sub>P/NF: (a) CoP-CNT nanosheet, (b) CoP NPs surrounded by CNTs in the nanosheet, (c) CoP NPs encapsulated by carbon layer. (d) and (e) some irregular hollow CoP NPs in the nanosheet.

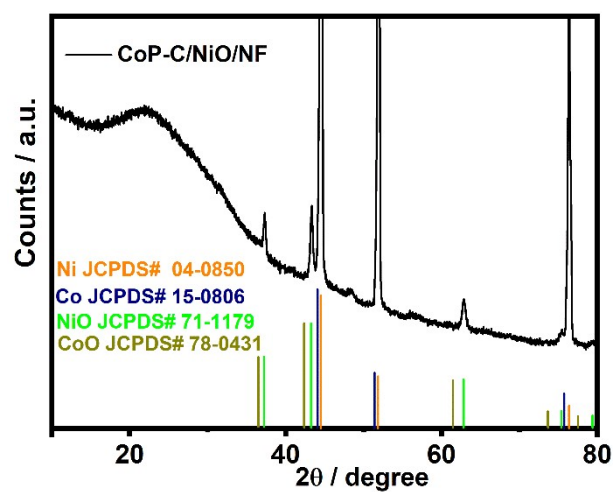

**Fig. S8** The spectrum to contrast the XRD pattern of CoP-C/NiO/NF and the standard card of metallic Co/Ni and CoO/NiO.

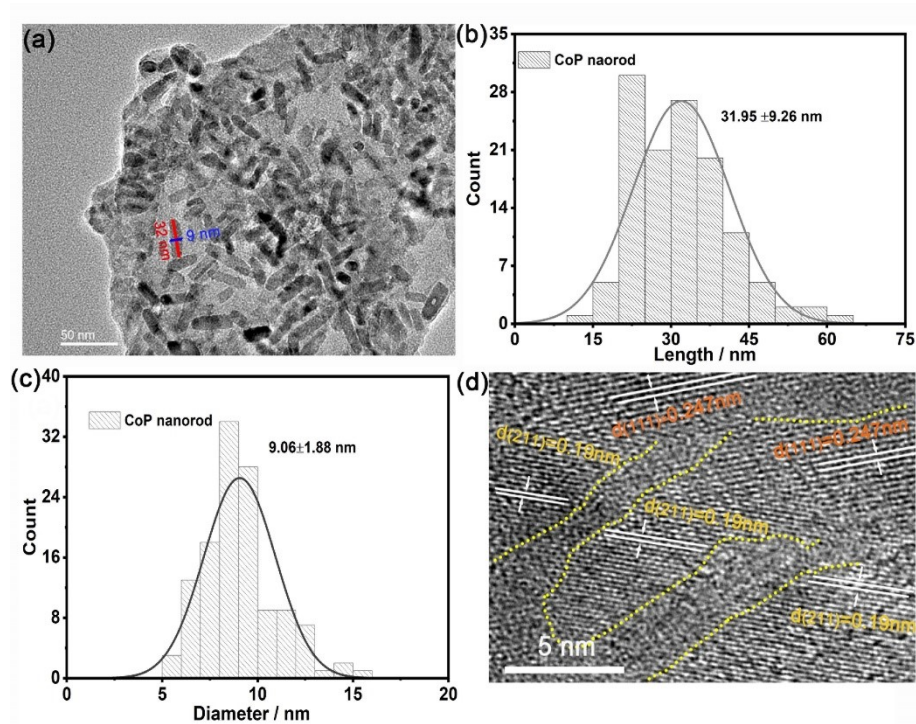

**Fig. S9** (a)TEM image of the CoP-C nanosheet in the CoP-C/NiO/NF. (b) and (c) the size distribution of the CoP nanorod. (d) HRTEM image of the CoP-C nanosheet in the CoP-C/NiO/NF (edge site)

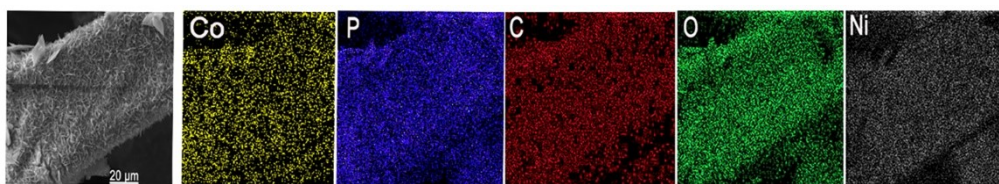

**Fig. S10** The energy-dispersive X-ray spectroscopy elemental mapping images of CoP-C/NiO/NF.

**Table S1** The corresponding elements ratio in CoP-C/NiO/NF calculated by EDS.

| Co (atom%) | P (atom %) | C (atom %) | O (atom %) | Ni (atom %) |
|------------|------------|------------|------------|-------------|
| 5.96       | 14.11      | 23.49      | 30.94      | 25.50       |

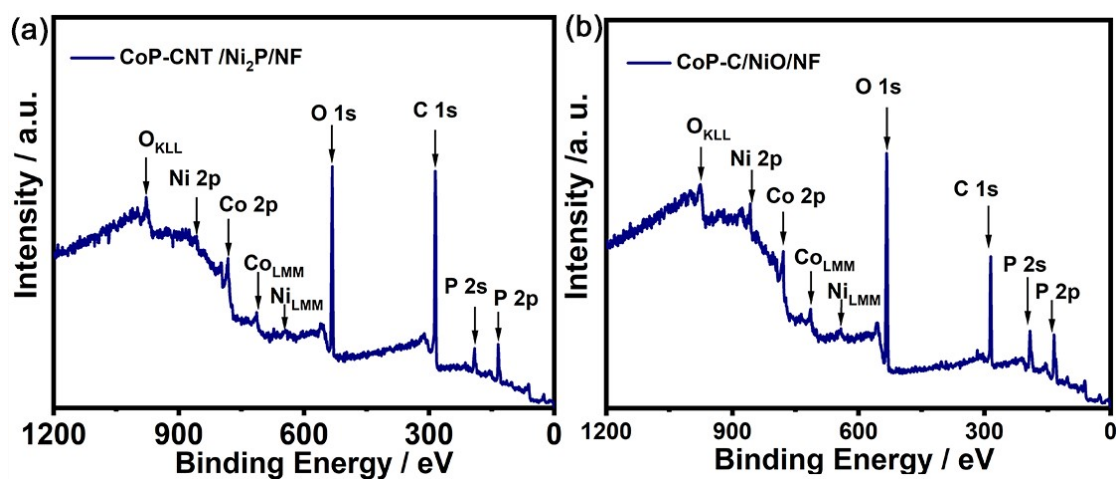

**Fig. S11** XPS survey spectra of the CoP-CNT/Ni<sub>2</sub>P/NF (a) and CoP-C/NiO/NF (b).

Fig. S11 shows characteristic peaks from outer electrons (s, p) and Auger electrons (LMM, KLL) of Ni, Co, O, C and P atoms in CoP-CNT/ Ni<sub>2</sub>P/NF and CoP-C/NiO/NF.

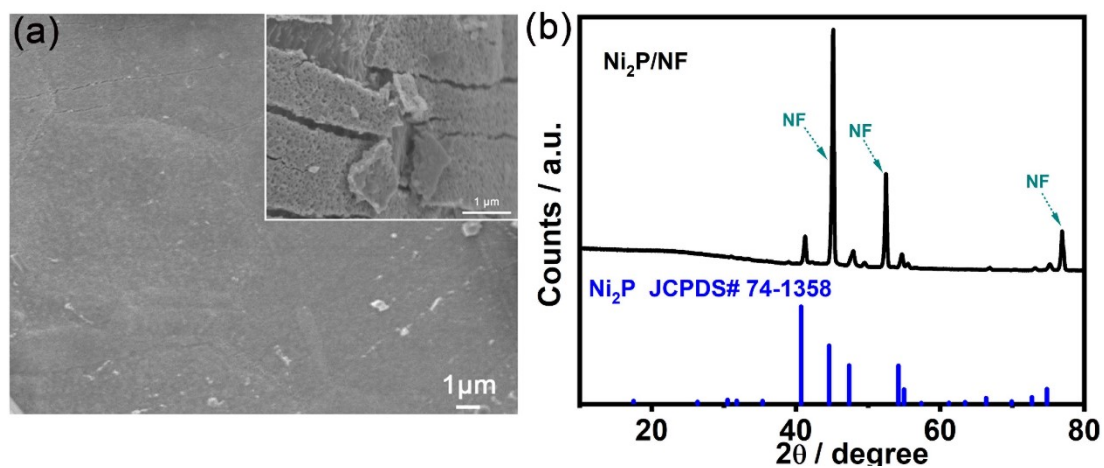

**Fig. S12** (a) Low and high magnification (Inset) SEM image of Ni<sub>2</sub>P/NF, (b) XRD pattern of Ni<sub>2</sub>P/NF.

As shown in Fig. S12, the surface of NF seems smooth in the low magnification SEM image, while in the high magnification SEM image, a film of the Ni<sub>2</sub>P on the NF could be observed. And XRD analysis proves the successful synthesis of Ni<sub>2</sub>P on the surface of NF (Ni<sub>2</sub>P/NF)

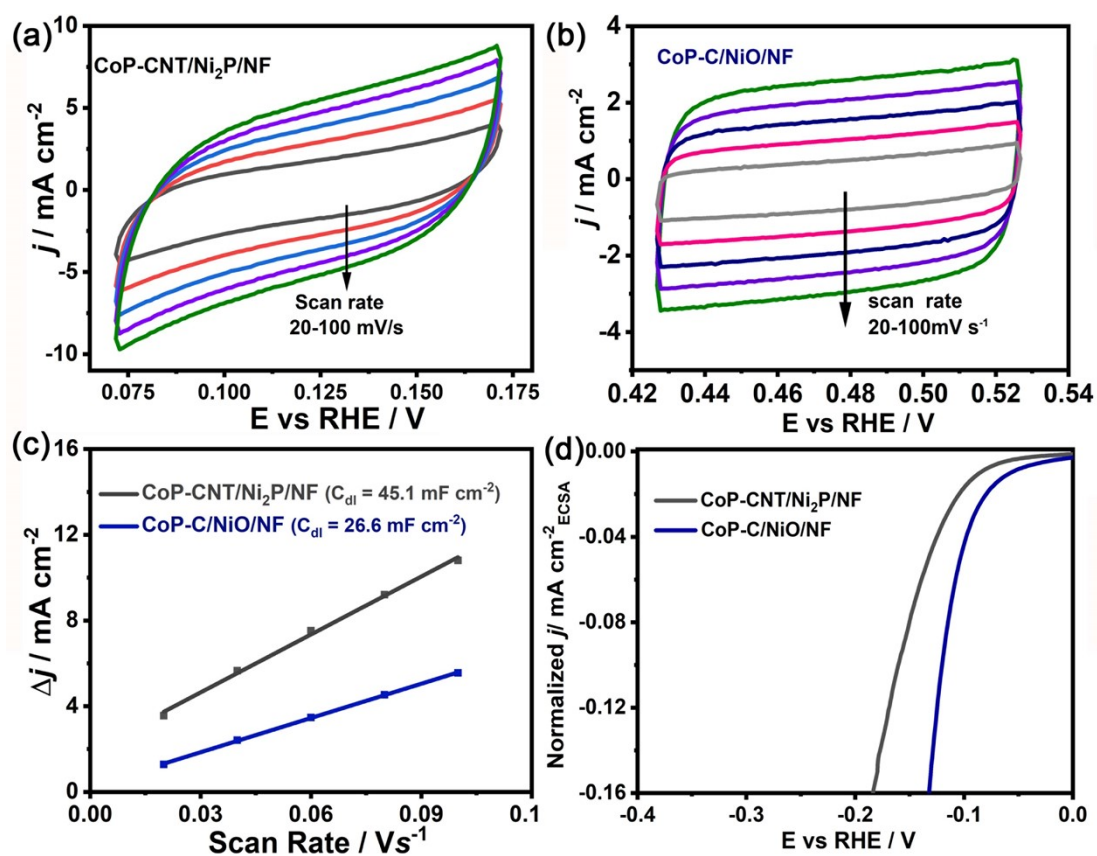

**Fig. S13** Cyclic voltammetry curves of the CoP-CNT/Ni<sub>2</sub>P/NF (a) and CoP-C/NiO/NF (b) at different scan rates from 20 mV s<sup>-1</sup> to 100 mV s<sup>-1</sup> in 1.0 M KOH solution. (c) The corresponding  $C_{dl}$  plots. (d) ECSA-normalized polarization curves of the CoP-CNT/Ni<sub>2</sub>P/NF and CoP-C/NiO/NF.

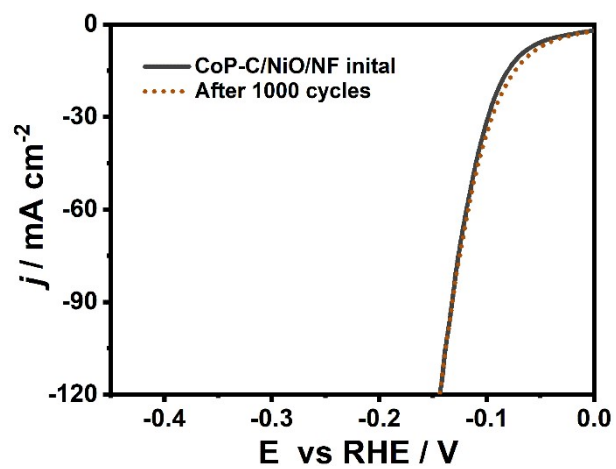

**Fig. S14** The LSV curve of the CoP-C/NiO/NF toward HER in 1.0 M KOH solution before and after 1000 cycles.

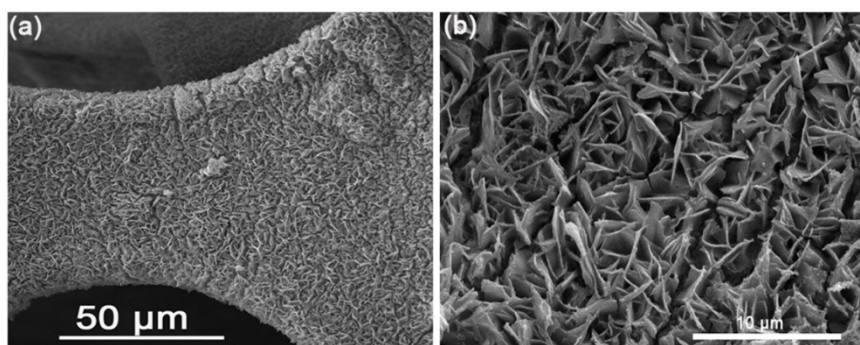

**Fig. S15** The SEM images of the CoP-CNT/NiO/NF catalyst after long-time electrolysis towards HER for 20 h in 1.0 M KOH.

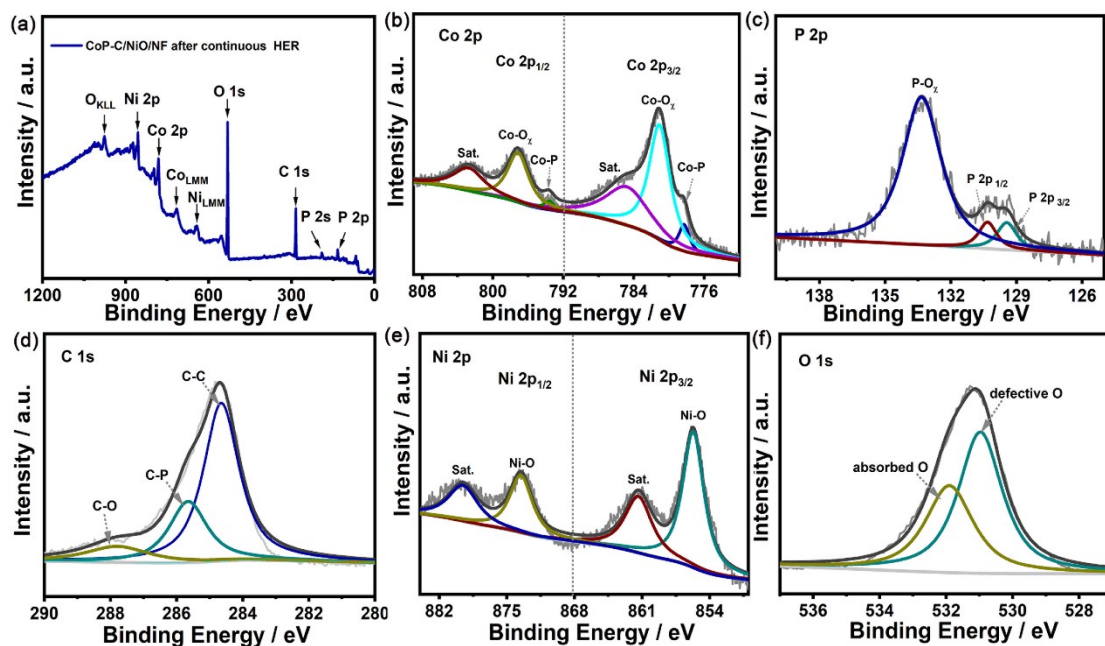

**Fig. S16** The XPS spectrum of the CoP-C/NiO/NF catalyst after 20 h electrolysis toward HER in 1.0 M KOH solution: (a) survey -scan spectra (b) Co 2p (c) P 2p (d) C 1s (e) Ni 2p (f) O 1s.

**Table S2** Comparison of HER and OER performance of self -supporting CoP-C nanosheet arrays with some previously reported CoP-based catalysts in 1.0 M KOH solution.

| Catalyst                        | HER                 |                                        | OER                 |                                        | Reference                                                   |
|---------------------------------|---------------------|----------------------------------------|---------------------|----------------------------------------|-------------------------------------------------------------|
|                                 | $\eta_{10}$<br>(mV) | Tafel Slope<br>(mV dec <sup>-1</sup> ) | $\eta_{10}$<br>(mV) | Tafel Slope<br>(mV dec <sup>-1</sup> ) |                                                             |
| CoP-C/NiO/NF                    | 72                  | 51                                     | 265                 | 65                                     | This work                                                   |
| CoP-CNT/ Ni <sub>2</sub> P/NF   | 82                  | 62                                     | 253                 | 58                                     | This work                                                   |
| 2D CoP@NC                       | 127                 | 58                                     | 300                 | ---                                    | <i>ACS Catal.</i> <b>2017</b> , 7, 3824.                    |
| CoP@BCN                         | 215                 | 52                                     | ---                 | ---                                    | <i>Adv. Energy Mater.</i> <b>2017</b> , 7, 1601671.         |
| NiO@NiCoP                       | 112                 | 56                                     | ---                 | ---                                    | <i>Electrochim. Acta</i> <b>2018</b> , 292, 88.             |
| CoP/NPC/TF                      | 80                  | 50                                     | ---                 | ---                                    | <i>Adv. Energy Mater.</i> <b>2019</b> , 9, 1803970.         |
| CoP/Co-MOF/CF                   | 34                  | 43                                     | ---                 | ---                                    | <i>Angew. Chem., Int. Ed.</i> <b>2019</b> , 58, 4679.       |
| W-CoP NAs/CC                    | 94                  | 63                                     | ---                 | --                                     | <i>Small</i> <b>2019</b> , 15, 1902613.                     |
| CoP/Co <sub>2</sub> P@NC/Ti     | 49                  | 51                                     | --                  | --                                     | <i>I Sci.</i> <b>2020</b> , 101264.                         |
| CoP-Ni <sub>2</sub> P           | 105                 | 64                                     | 320                 | 69                                     | <i>ACS Appl. Mater. Interfaces</i> <b>2017</b> , 9, 23222.  |
| CoP/NCNHP                       | 115                 | 66                                     | 310                 | 70                                     | <i>J. Am. Chem. Soc.</i> <b>2018</b> , 140, 2610.           |
| Holey Ni-Co-P nanosheet         | 58                  | 57                                     | 280                 | ---                                    | <i>J. Am. Chem. Soc.</i> <b>2018</b> , 140, 5241.           |
| CoP(MoP)-CoMoO <sub>3</sub> @CN | 198                 | 95                                     | 296                 | 105                                    | <i>ACS Appl. Mater. Interfaces</i> <b>2019</b> , 11, 6890.  |
| Co <sub>1</sub> P@NC            | 187                 | 58.5                                   | 380                 | 79.5                                   | <i>Carbon</i> <b>2019</b> , 145, 694.                       |
| CoP@NPCP nanoplate              | 150                 | 20                                     | 421                 | 115                                    | <i>Carbon</i> <b>2019</b> . 150. 446.                       |
| C-CoP nanocages                 | 173                 | 63.1                                   | 333                 | 71.1                                   | <i>Nanoscale</i> <b>2019</b> , 11, 17084.                   |
| Ni <sub>2</sub> P@G             | 103                 | 56.5                                   | 275<br>(20)         | 56.2                                   | <i>J. Mater. Chem. A</i> <b>2019</b> , 7, 13455.            |
| (FeNiP)/P-doped graphene        | 173                 | 50.3                                   | 229                 | 49.7                                   | <i>J. Mater. Chem. A</i> <b>2019</b> , 7, 14526.            |
| CoP/CN@MoS <sub>2</sub>         | 149                 | 88                                     | 289                 | 69                                     | <i>ACS Appl. Mater. Interfaces</i> <b>2019</b> , 11, 36649. |
| Ce-CoP                          | 144                 | 70                                     | 270                 | 63                                     | <i>ACS Sustain. Chem. Eng.</i> <b>2020</b> , 8, 10009.      |

|                                                            |             |      |             |      |                                                            |
|------------------------------------------------------------|-------------|------|-------------|------|------------------------------------------------------------|
| <b>CoP -InNC@CNT</b>                                       | 159         | 56   | 270         | 84   | <i>Adv. Sci.</i> <b>2020</b> , 7, 1903195.                 |
| <b>Co-P@PC</b>                                             | 76          | ---  | 280         | 53   | <i>Small</i> <b>2020</b> , 16, 1900550.                    |
| <b>hcp-Co@NC</b>                                           | 90          | 90.7 | 290         | 71.2 | <i>Appl.Catal.-B: Environ.</i> <b>2020</b> , 266, 118621.  |
| <b>C@ Ni<sub>8</sub>P<sub>3</sub>/NF</b>                   | 110         | 46   | 267         | 51   | <i>ACS Appl. Mater. Interfaces</i> <b>2016</b> , 8, 27850. |
| <b>Co<sub>2</sub>P/Co foil</b>                             | 159         | 59   | 319         | 79   | <i>J. Mater. Chem. A</i> <b>2017</b> , 5, 10561.           |
| <b>CoO@CoNC @ NF</b>                                       | 190         | 98   | 309         | 53   | <i>Chem</i> <b>2017</b> , 2, 791.                          |
| <b>NiFe LDH@NiCoP/NF</b>                                   | 120         | 88.2 | 220         | 48.6 | <i>Adv. Funct. Mater.</i> <b>2018</b> , 28, 1706847.       |
| <b>CoP NS/CC</b>                                           | 90          | 53.5 | 310         | 53.9 | <i>J. Mater. Chem. A</i> <b>2018</b> , 6, 24277.           |
| <b>WCoP @ (S, N)-C/CC</b>                                  | 67          | 66   | 280         | ---  | <i>ACS Energy Lett.</i> <b>2018</b> , 3, 1434.             |
| <b>2%Mo-Ni<sub>2</sub>P/CoP/NF</b>                         | 118<br>(50) | 45.4 | 319<br>(50) | 46.1 | <i>Appl. Catal.-B: Environ.</i> <b>2020</b> , 272, 118951. |
| <b>NiCoP/C nanobox</b>                                     | ---         | ---  | 330         | 96   | <i>Angew. Chem. Int. Ed.</i> <b>2017</b> , 56, 3897.       |
| <b>CoPi-HSNPC-800</b>                                      | --          | --   | 320         | 85   | <i>ACS Sustain. Chem. Eng.</i> <b>2019</b> , 7, 13559.     |
| <b>CoP-NC-CNT</b>                                          | ---         | ---- | 251         | 82.1 | <i>Carbon</i> <b>2019</b> , 141, 643.                      |
| <b>NiCoP-O/NC nanosheets</b>                               | --          | --   | 300         | 94   | <i>Nano Energy</i> <b>2020</b> , 9, 104453.                |
| <b>CoP/D-Co-Cu MOF</b>                                     | ---         | ---  | 290         | 65   | <i>J. Mater. Chem. A</i> <b>2020</b> , 8, 14099.           |
| <b>Co<sub>3</sub>O<sub>4</sub>@CoP /Ni foil</b>            | ---         | ---  | 238         | 51.4 | <i>Adv. Energy Mater.</i> <b>2017</b> , 7, 1602643.        |
| <b>Co<sub>3</sub>O<sub>4</sub>@Ni<sub>2</sub>P-CoP /NF</b> | ---         | ---  | 290<br>(50) | 75   | <i>Electrochim. Acta</i> <b>2019</b> , 298, 525.           |
| <b>CoS<sub>2</sub>@NGC@NF</b>                              | --          | --   | 243         | 71   | <i>J. Mater. Chem. A</i> <b>2020</b> , 8, 6795.            |

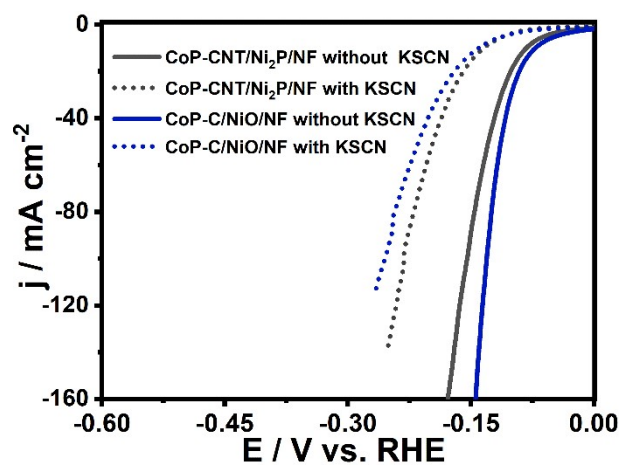

**Fig. S17** Polarization curves of the CoP-CNT/Ni<sub>2</sub>P/NF and CoP-C/NiO/NF with and without the addition of 10 mmol KSCN toward HER in 1.0 M KOH.

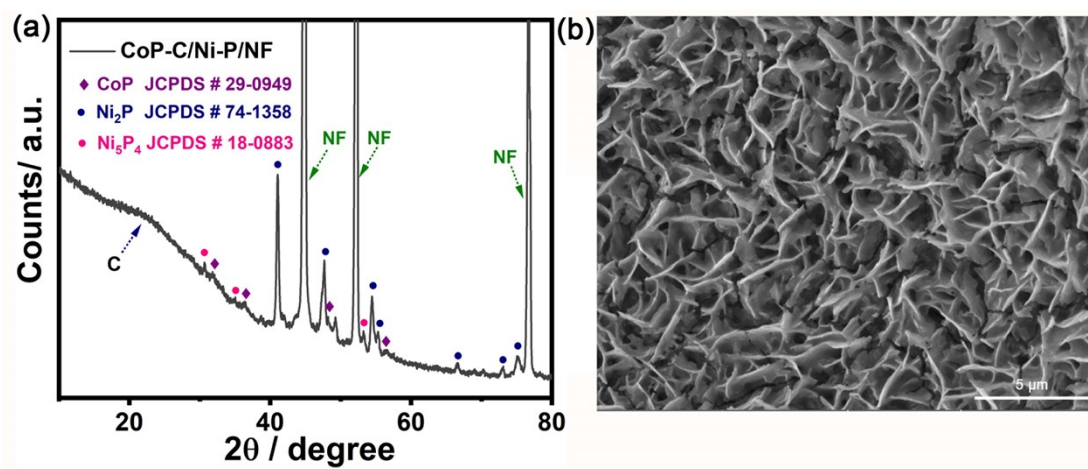

**Fig. S18** XRD pattern (a) and SEM image (b) of the CoP-C/Ni-P/NF.

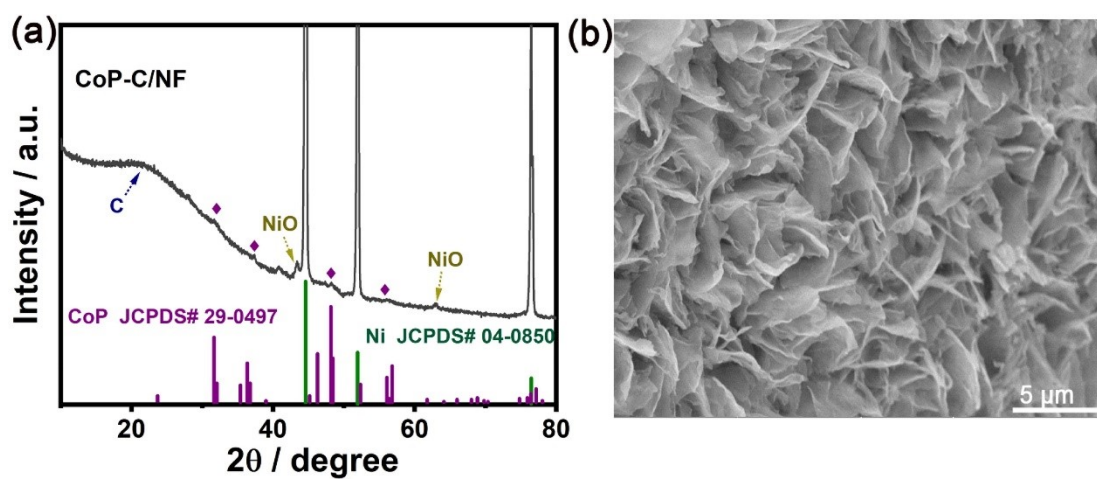

**Fig. S19** XRD pattern (a) and SEM image (b) CoP-C/NF.

As shown by the XRD pattern in Fig. S19, less NiO was resting on the surface of NF in CoP-C/NF.

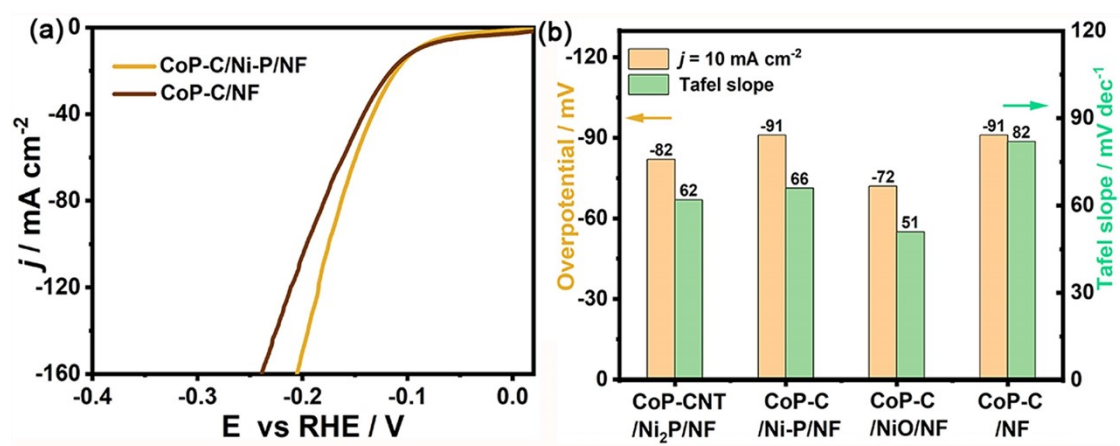

**Fig. S20** (a) polarization curves of the CoP-C/Ni-P/NF and CoP-C/NF toward HER in 1.0 M KOH solution at a scan rate of 5 mV s<sup>-1</sup>. (b) The histogram of the overpotential at  $j = 10$  mA cm<sup>-2</sup> and corresponding Tafel slope for the synthesized Co-based catalysts toward HER in 1.0 M KOH solution.

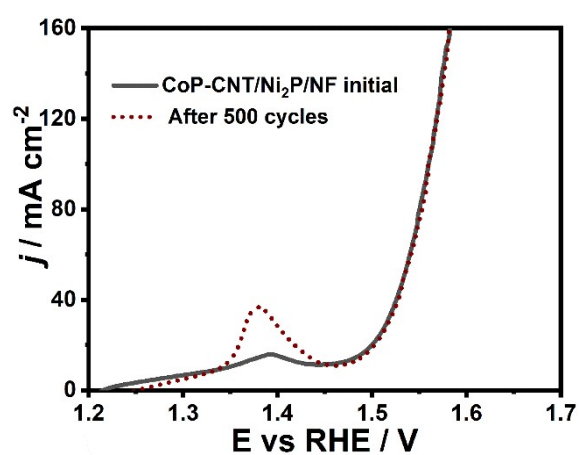

**Fig. S21** The LSV curve of the CoP-CNT/Ni<sub>2</sub>P/NF towards OER in 1.0 M KOH before and after 500 cycles.

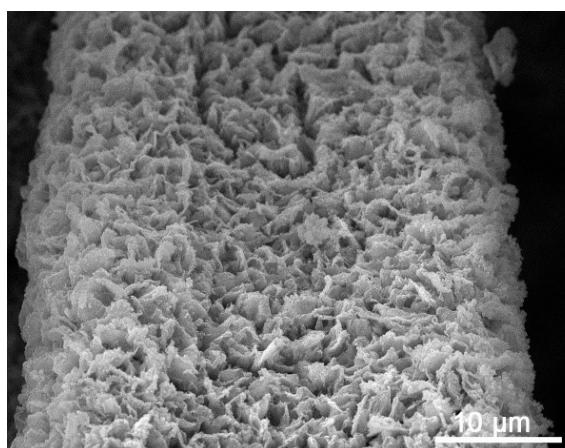

**Fig. S22** SEM image of the CoP-CNT/Ni<sub>2</sub>P/NF catalyst after long-time electrolysis toward OER in 1.0 M KOH.

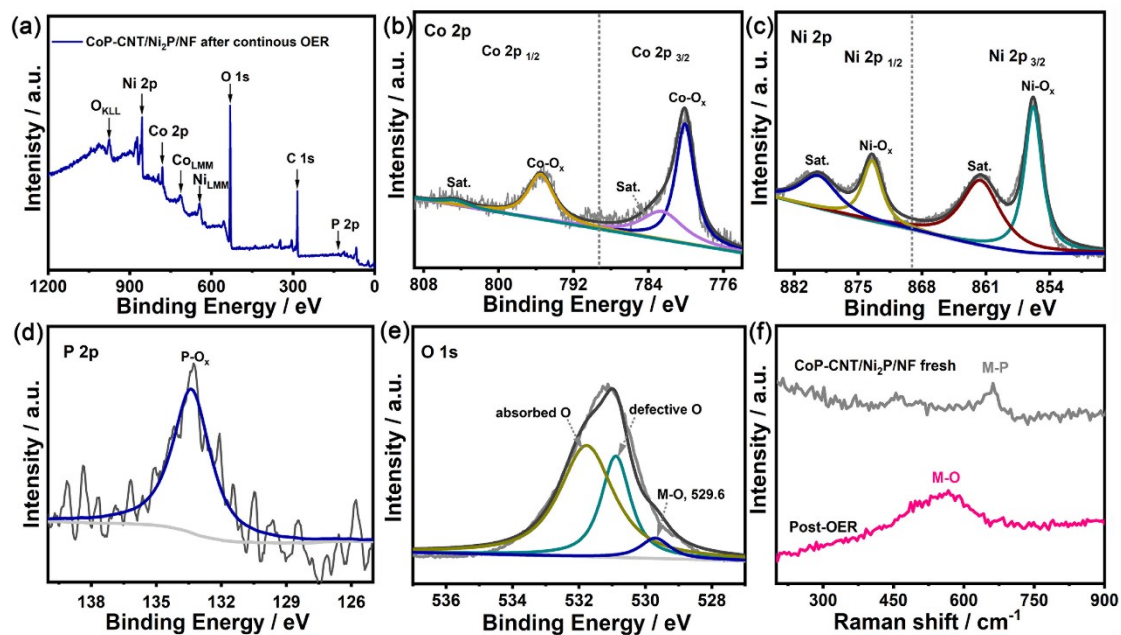

**Fig. S23** (a-e) The XPS spectrum of the CoP-CNT/Ni<sub>2</sub>P/NF catalyst after long-time electrolysis towards OER in 1.0 M KOH. (f) Raman spectra of the CoP-CNT/Ni<sub>2</sub>P/NF before and post OER.

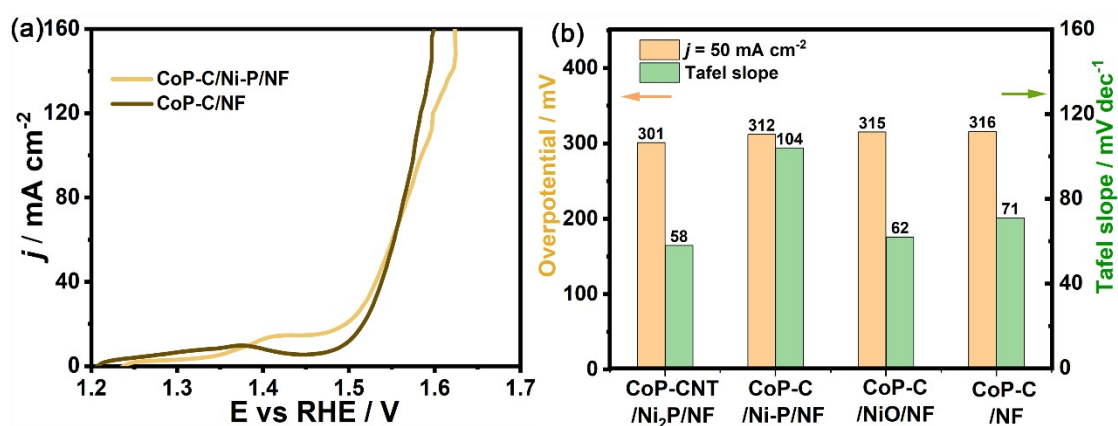

**Fig. S24** (a) Polarization curves of the CoP-C/Ni-P and CoP-C/NF towards OER in 1.0 M KOH at a scan rate of  $1 \text{ mV s}^{-1}$ . (b) The histogram of the overpotential at  $50 \text{ mA cm}^{-2}$  and corresponding Tafel slope for the synthesized Co-based catalysts towards OER in 1.0 M KOH.

**Table S3** Comparison of overall water splitting performance of self -supporting CoP-C nanosheet arrays with some previously reported Co/Ni-based catalysts in 1.0 M KOH solution.

| Catalyst                                                                 | Cell voltage<br>( $j=10 \text{ mA cm}^{-2}$ , $\eta_{10}$ ) | Reference                                                   |
|--------------------------------------------------------------------------|-------------------------------------------------------------|-------------------------------------------------------------|
| CoP-C/NiO/NF    CoP-CNT/NiO/NF                                           | 1.57 V                                                      | This work                                                   |
| CoP/NCNHP                                                                | 1.64 V                                                      | <i>J. Am. Chem. Soc.</i> <b>2018</b> , 140, 2610.           |
| Co/CoP-HNP                                                               | 1.68 V                                                      | <i>Mater. Horiz.</i> <b>2018</b> , 5, 108.                  |
| Ni <sub>2</sub> P-NPCMS                                                  | 1.62 V                                                      | <i>Electrochim. Acta</i> <b>2019</b> , 297, 755             |
| Co-P@PC                                                                  | 1.60 V                                                      | <i>Small</i> <b>2020</b> , 16, 1900550.                     |
| CoP@a-CoOx                                                               | 1.66 V                                                      | <i>Adv. Sci.</i> <b>2018</b> , 5, 1800514                   |
| Co <sub>2</sub> P/Mo <sub>2</sub> C/Mo <sub>3</sub> -Co <sub>3</sub> C@C | 1.74 V                                                      | <i>J. Mater. Chem. A</i> <b>2018</b> , 6, 5789.             |
| NiCoP@NiFe                                                               | 1.57 V                                                      | <i>Adv. Funct. Mater.</i> <b>2018</b> , 28, 1706847.        |
| Ni <sub>2</sub> P/CoN-PCP                                                | 1.58 V                                                      | <i>Chem. Commun.</i> <b>2018</b> , 54, 12101.               |
| CoP-InNC@CNT                                                             | 1.58 V                                                      | <i>Adv. Sci.</i> <b>2020</b> , 7, 1903195.                  |
| Ni-Co-P/NF                                                               | 1.58 V                                                      | <i>Nano Lett.</i> <b>2016</b> , 16, 7718.                   |
| 2D Fe-doped CoP arrays                                                   | 1.60 V                                                      | <i>Nano Energy</i> <b>2017</b> , 41, 583.                   |
| NiO/NF    Ni <sub>2</sub> P/NF                                           | 1.70 V                                                      | <i>Nanoscale</i> <b>2017</b> , 9, 4409.                     |
| Ni-Co-P-HNBs /NF                                                         | 1.62 V                                                      | <i>Energy Environ. Sci.</i> <b>2018</b> , 11, 872.          |
| NiCoP/NF@NC                                                              | 1.57V                                                       | <i>ACS Appl. Mater. Interfaces</i> <b>2018</b> , 10, 41237. |
| WCoP @ (S, N)-C/CC                                                       | 1.65 V                                                      | <i>ACS Energy Lett.</i> <b>2018</b> , 3, 1434.              |
| CoNiP@CN/NF                                                              | 1.59 ( $\eta_{30}$ )                                        | <i>Appl. Catal.-B: Environ.</i> <b>2019</b> , 259, 118053.  |
| N-Co-Ni-P/NF    Fe-Co-OOH/NF                                             | 1.51 V                                                      | <i>ACS Sustain. Chem. Eng.</i> <b>2020</b> , 8, 8949.       |
| NiCoP@NiMn/NF                                                            | 1.51 V                                                      | <i>ACS Appl. Mater. Interfaces</i> <b>2020</b> , 12, 4385.  |
| 2%Mo-Ni <sub>2</sub> P/CoP/NF                                            | 1.57V                                                       | <i>Appl. Catal.-B: Environ.</i> <b>2020</b> , 272, 118951.  |
| Co-NCNTFS/NF                                                             | 1.62 V                                                      | <i>ACS Appl. Mater. Interfaces</i> <b>2020</b> , 12, 3592.  |
